# Supplementary material for: A computationally efficient model for probabilistic local warming projections constrained by history matching and pattern scaling
Source: Copernicus journal article supplement (doi:10.5194/gmd-2019-264), 2019-10-17
Supplement: Supplementary file 1 [file gmd-2019-264-supplement.pdf]

Supplementary Material for *A computationally efficient model for probabilistic local warming projections constrained by history matching and pattern scaling*

A manuscript submitted to *Geoscientific Model Development Discussions*

Philip Goodwin<sup>1,\*</sup>, Martin Leduc<sup>2</sup>, Antti-Ilari Partanen<sup>3</sup>, H. Damon Matthews<sup>4</sup> and Alex Rogers<sup>5</sup>

<sup>1</sup> Ocean and Earth Science, University of Southampton, National Oceanography Centre Southampton, Southampton, SO14 3ZH, UK

<sup>2</sup> Ouranos, Montreal, Canada

<sup>3</sup> Climate System Research, Finnish Meteorological Institute, Helsinki, Finland

<sup>4</sup> Department of Geography, Planning and Environment, Concordia University, Montreal, Canada

<sup>5</sup> Department of Computer Science, University of Oxford, Oxford, UK

\* Corresponding author, email: p.a.goodwin@soton.ac.uk

This file contains Supplementary Tables S1 and S2.

| Model name    | Institution                                                                                                                                                               |
|---------------|---------------------------------------------------------------------------------------------------------------------------------------------------------------------------|
| bcc-csm1-1    | Beijing Climate Center, China Meteorological Administration                                                                                                               |
| BNU-ESM       | College of Global Change and Earth System Science, Beijing Normal University                                                                                              |
| CanESM2       | Canadian Centre for Climate Modelling and Analysis                                                                                                                        |
| CCSM4         | National Center for Atmospheric Research                                                                                                                                  |
| CESM1-BGC     | Community Earth System Model Contributors                                                                                                                                 |
| CNRM-CM5      | Centre National de Recherches Meteorologiques / Centre Europeen de Recherche et Formation Avancees en Calcul Scientifique                                                 |
| CSIRO-Mk3-6-0 | Commonwealth Scientific and Industrial Research Organisation in collaboration with the Queensland Climate Change Centre of Excellence                                     |
| GFDL-ESM2G    | Geophysical Fluid Dynamics Laboratory                                                                                                                                     |
| GFDL-ESM2M    | Geophysical Fluid Dynamics Laboratory                                                                                                                                     |
| GISS-E2-R     | NASA Goddard Institute for Space Studies                                                                                                                                  |
| HadGEM2-ES    | Met Office Hadley Centre (additional HadGEM2-ES realizations contributed by Instituto Nacional de PesquisasEspaciais)                                                     |
| INM-CM4       | Institute for Numerical Mathematics                                                                                                                                       |
| IPSL-CM5A-LR  | Institut Pierre-Simon Laplace                                                                                                                                             |
| IPSL-CM5A-MR  | Institut Pierre-Simon Laplace                                                                                                                                             |
| IPSL-CM5B-LR  | Institut Pierre-Simon Laplace                                                                                                                                             |
| MIROC-ESM     | Japan Agency for Marine-Earth Science and Technology, Atmosphere and Ocean Research Institute (The University of Tokyo), and National Institute for Environmental Studies |
| MIROC5        | Atmosphere and Ocean Research Institute (The University of Tokyo), National Institute for Environmental Studies, and Japan Agency for Marine-Earth Science and Technology |
| MPI-ESM-LR    | Max-Planck-InstitutfürMeteorologie (Max Planck Institute for Meteorology)                                                                                                 |
| MPI-ESM-MR    | Max-Planck-InstitutfürMeteorologie (Max Planck Institute for Meteorology)                                                                                                 |
| MRI-CGCM3     | Meteorological Research Institute                                                                                                                                         |
| NorESM1-M     | Norwegian Climate Centre                                                                                                                                                  |
| NorESM1-ME    | Norwegian Climate Centre                                                                                                                                                  |

Supplementary Table S1. CMIP5 models and the institutions that provided the model data used in this study.

| <b>Observational constraint</b>                                              | <b>Observation-consistent range</b> | <b>Comment/References</b>                                                                                                                                                                                                      | <b>Posterior model ensemble, 95 % range</b> |
|------------------------------------------------------------------------------|-------------------------------------|--------------------------------------------------------------------------------------------------------------------------------------------------------------------------------------------------------------------------------|---------------------------------------------|
| Global mean temperature anomaly, 1986-2005 relative to 1850-1900             | 0.55 to 0.67 °C                     | Constraint amended from 2003-2012 period in Goodwin et al. (2018b) to 1986-2005 period here, so that the final time-average includes a significant volcanic eruption. Range based on 90% observational range from IPCC (2013). | 0.55 to 0.67 °C                             |
| Global mean temperature anomaly, 2007-2016 relative to 1971-1980             | 0.56 to 0.69 °C                     | Constraints and ranges as used in Goodwin et al. (2018b). Based on: (Morice et al. 2012; GISTEMP, 2018; Hansen et al., 2010; Smith et al., 2008; Vose et al., 2012)                                                            | 0.56 to 0.68 °C                             |
| Global mean temperature anomaly, 2007-2016 relative to 1951-1960             | 0.54 to 0.78 °C                     |                                                                                                                                                                                                                                | 0.61 to 0.78 °C                             |
| Global mean sea-surface temperature anomaly, 2003-2012 relative to 1850-1900 | 0.56 to 0.68 °C                     | Constraint and range as used in Goodwin et al. (2018b). Based on (Kennedy et al., 2011; Huang et al., 2015)                                                                                                                    | 0.56 to 0.68 °C                             |
| Whole ocean heat content anomaly, 2010 relative to 1971                      | 117 to 332 ZJ                       | Constraints and ranges as used in Goodwin et al. (2018b). Based on (Levitus et al., 2012; Giese et al., 2011; Balmaseda et al., 2013; Good et al., 2013; Smith et al., 2018; Cheng et al., 2017)                               | 128 to 325 ZJ                               |
| Upper 700m ocean heat content anomaly, 2010 relative to 1971                 | 98 to 170 ZJ                        |                                                                                                                                                                                                                                | 98 to 170 ZJ                                |
| Terrestrial carbon uptake, 2011 relative to preindustrial                    | 70 to 250 PgC                       | Constraint and range as used in Goodwin et al. (2018). Based on IPCC (2013)                                                                                                                                                    | 97 to 254 PgC                               |
| Rate of terrestrial carbon uptake, 2000 to 2009                              | 1.4 to 3.8 PgC yr <sup>-1</sup>     | Constraint and range as used in Goodwin et al. (2018b). Based on IPCC (2013)                                                                                                                                                   | 1.4 to 3.7 PgC yr <sup>-1</sup>             |
| Ocean carbon uptake, 2011 relative to preindustrial                          | 125 to 185 PgC                      | Constraint and range as used in Goodwin et al. (2018b). Based on IPCC (2013)                                                                                                                                                   | 125 to 182 PgC                              |

Supplementary Table S2: The observational consistency tests used to extract WASP simulations, and 95 % range of simulated values in the final WASP ensemble. Following the method outlined in Goodwin et al. (2018b) a simulation is deemed observation consistent provided that: (1) all simulated quantities lie within 90 to 95 % uncertainty ranges for the observed quantities, or (2) the sum total of the deviation from the 90 to 95 % uncertainty ranges across all constraints is less than a small permitted level (Goodwin et al, 2018b). This permitted deviation allows the tails of the observational uncertainty distributions to be present within the observation-constrained simulations
